# Supplementary material for: In-Depth Characterization of bZIP Genes in the Context of Endoplasmic Reticulum (ER) Stress in Brassica campestris ssp. chinensis
Source: MDPI journal article supplement (doi:10.3390/plants13081160), 2024-04-22
Supplement: s1 [file s1]

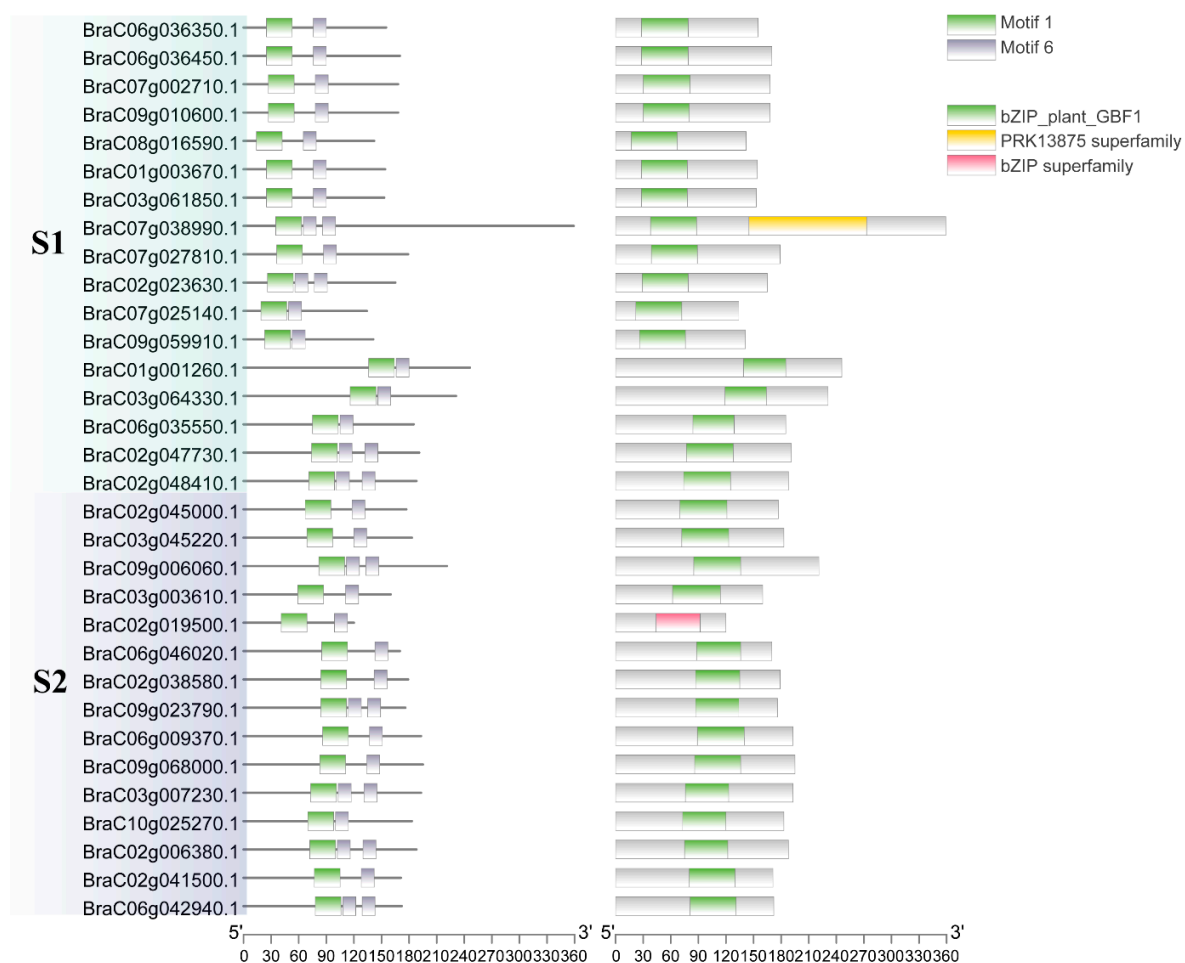

**Figure S2.** Domain and motif analysis of *BcbZIP* genes of subfamily S (S1 and S2). A representation of the structural characteristics of *BcbZIP* genes, highlighting the presence of *bZIP* domains and specific motifs responsible for their presence.

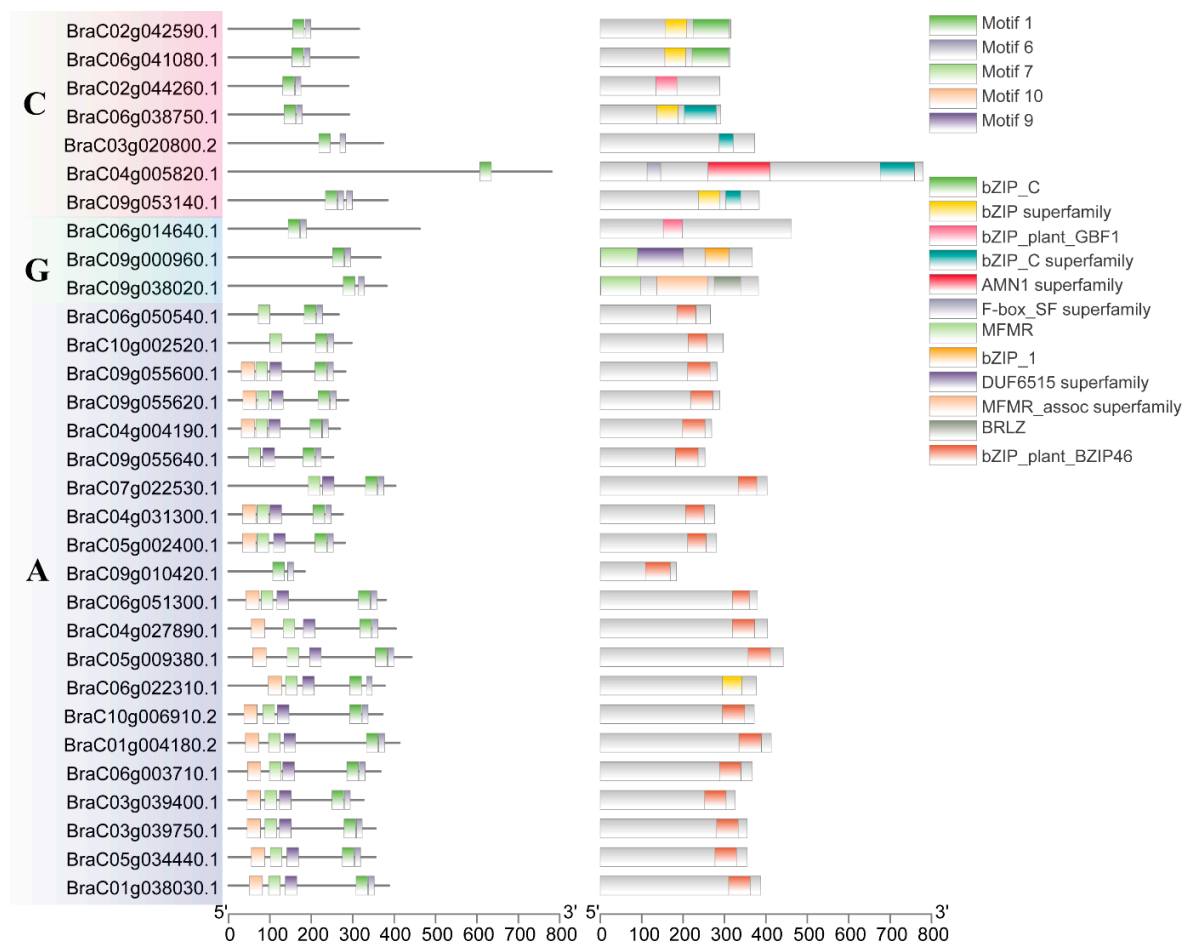

**Figure S3.** Domain and motif analysis of *BcbZIP* genes of subfamilies C, G, and A. A representation of structural characteristics of *BcbZIP* genes, highlighting presence of *bZIP* domains and specific motifs responsible for their presence.

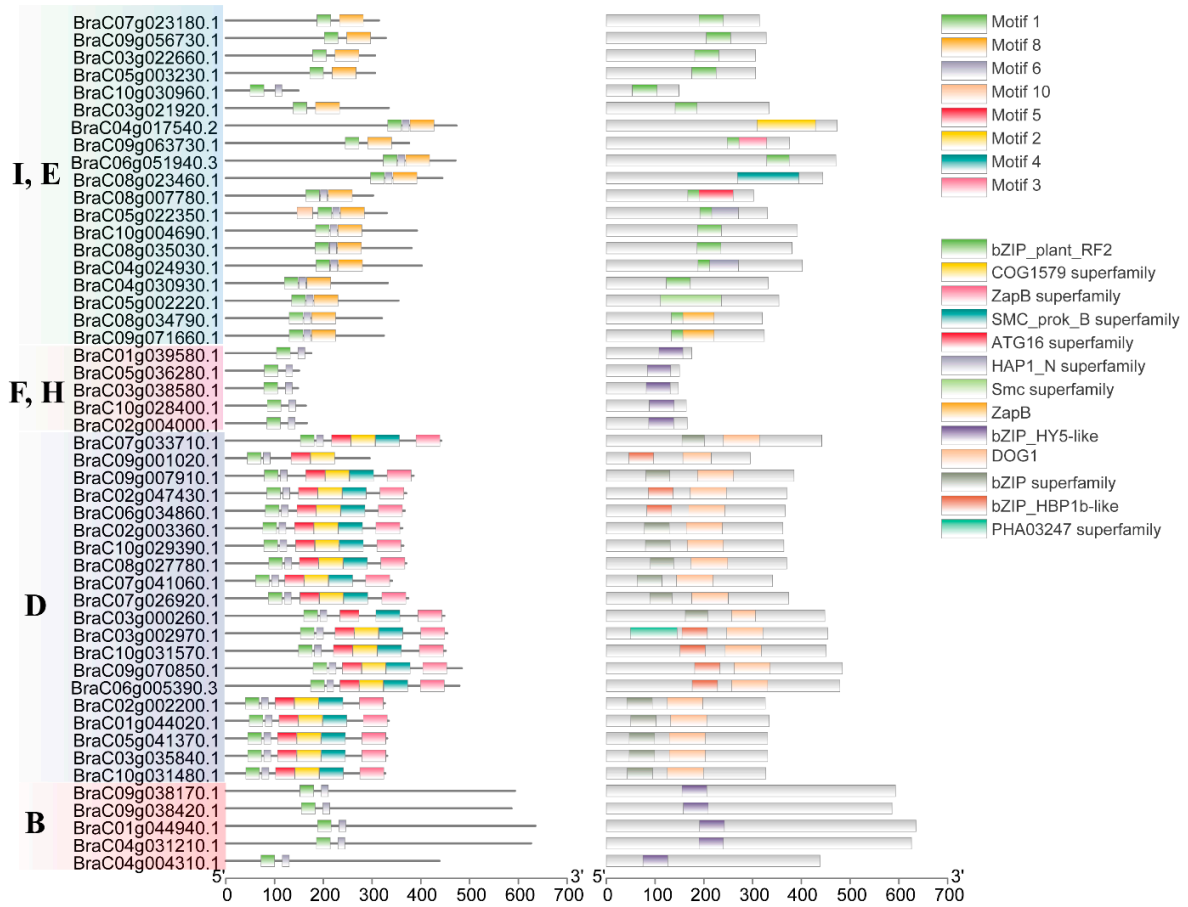

**Figure S4.** Domain and motif analysis of *BcbZIP* genes of subfamilies I, E, F, H, D, and B. A representation of structural characteristics of *BcbZIP* genes, highlighting presence of *bZIP* domains and specific motifs responsible for their presence.

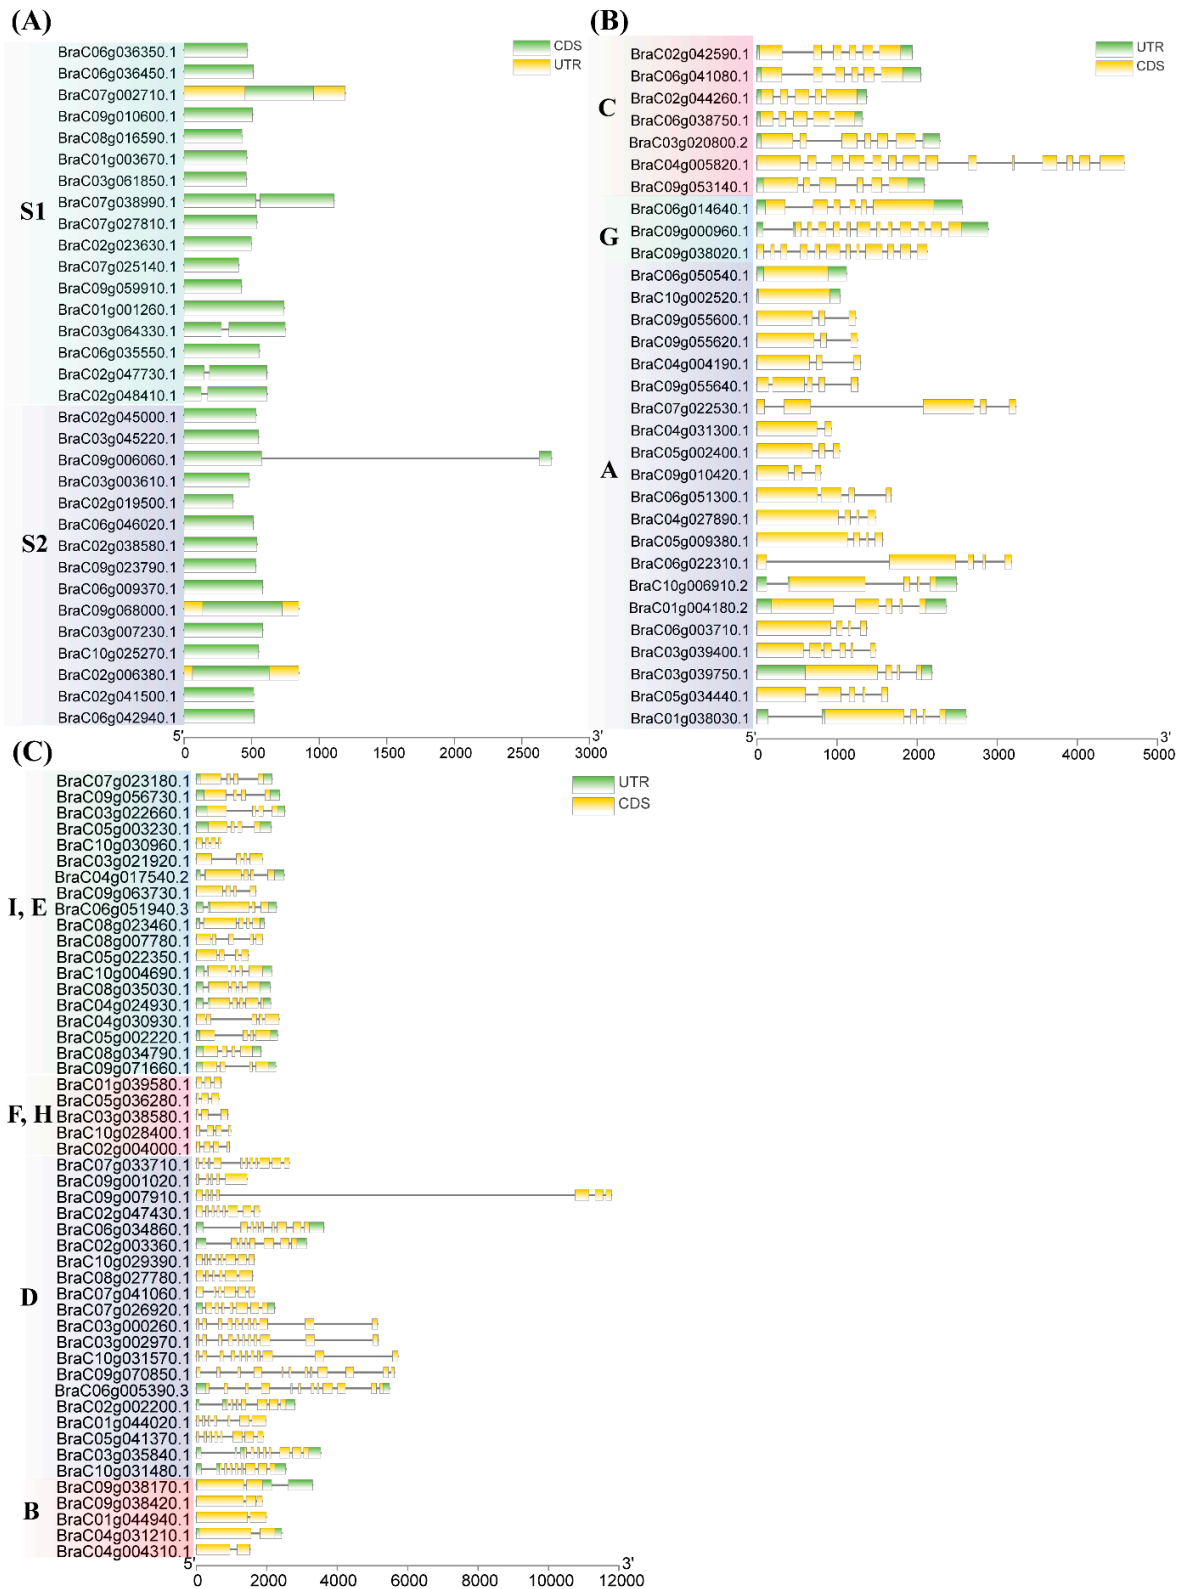

**Figure S5.** Gene Structure Organization of *BcbZIP* genes. Here; CDS is the coding region, UTR is the untranslated region. (A) Gene structure organization of subfamily S (S1 and S2). (B) Gene structure organization of subfamily C, G, and A. (C) Gene structure organization of subfamily I, E, F, H, D, and B.

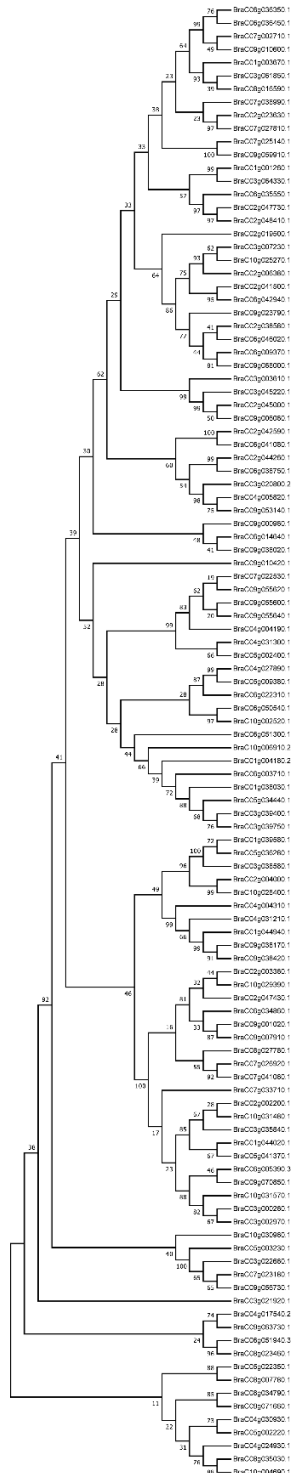

**Figure S6:** The 38 *BcbZIP* paralogous genes identified via Ka/Ks calculator.
