# Supplementary material for: In-Depth Characterization of bZIP Genes in the Context of Endoplasmic Reticulum (ER) Stress in Brassica campestris ssp. chinensis
Source: Plants (Basel). 2024 Apr 22;13(8):1160. doi: 10.3390/plants13081160 (PMC11053814; doi:10.3390/plants13081160)
Supplement: Supplementary file 1 [file plants-13-01160-s001.zip]

Archive with 4 entries (4 files):
- Supplementary file S1.xlsx
- Supplementary file S2.pdf
- Supplementary file S3.xlsx
- Supplementary file S4.xlsx
