# Supplementary material for: In-Depth Characterization of bZIP Genes in the Context of Endoplasmic Reticulum (ER) Stress in Brassica campestris ssp. chinensis
Source: Plants (Basel). 2024 Apr 22;13(8):1160. doi: 10.3390/plants13081160 (PMC11053814; doi:10.3390/plants13081160)
Supplement: Supplementary file 1 [file plants-13-01160-s001.zip › Supplementary file S1.xlsx]

## Sheet: Sheet1
Supplementary file S1
Transcript ID	Chr No	Chr start	End	Strand	AA	CDS	MW/kDa	PI	GRAVY	Formula	Predicted subcellular localization
BraC01g001260.1	1	653788	654528	Reverse	246	741	28558.1	6.14	-0.824	C1233H1962N372O386S12	Cytoplasm/Nucleus
BraC01g003670.1	1	1881103	1881567	Reverse	154	465	17386.5	5.39	-0.662	C730H1201N217O251S11	Nucleus
BraC01g004180.2	1	2116578	2118939	Reverse	413	2362	45585.5	9.35	-0.616	C1981H3182N590O615S15	Endoplasmic reticulum/Nucleus
BraC01g038030.1	1	30138728	30141340	Reverse	388	2613	42289.2	9.62	-0.838	C1811H2890N558O583S15	Endoplasmic reticulum/Nucleus
BraC01g039580.1	1	31288931	31289630	Reverse	175	700	19939.1	9.39	-1.242	C834H1379N263O289S7	Nucleus
BraC01g044020.1	1	33977001	33978970	Reverse	334	1970	37122.8	7.89	-0.54	C1581H2587N487O514S15	Nucleus
BraC01g044940.1	1	34609998	34611983	Reverse	635	1986	69181	5.84	-0.485	C3022H4805N839O966S26	Endoplasmic reticulum/Nucleus
BraC02g002200.1	2	1052290	1055087	Forward	326	2798	36643.1	8.87	-0.735	C1563H2534N480O509S14	Nucleus
BraC02g003360.1	2	1571742	1574870	Reverse	362	3129	41615.2	7.22	-0.538	C1825H2880N534O550S16	Nucleus
BraC02g004000.1	2	1836313	1837252	Reverse	166	940	18101.9	9.51	-1.171	C747H1258N254O265S2	Nucleus
BraC02g006380.1	2	2936284	2937133	Forward	188	850	21921.1	5.96	-1.05	C930H1475N289O312S7	Nucleus
BraC02g019500.1	2	11024899	11025261	Forward	120	363	14032.7	8.79	-1.078	C598H967N191O190S5	Nucleus
BraC02g023630.1	2	13861083	13861580	Forward	165	498	18043.1	6.31	-0.577	C766H1221N235O252S9	Endoplasmic reticulum
BraC02g038580.1	2	27228032	27228571	Forward	179	540	20895.2	6.31	-0.994	C883H1432N274O297S8	Cytoplasm/Nucleus
BraC02g041500.1	2	29226808	29227323	Forward	171	516	19916.2	6.09	-0.94	C863H1354N252O277S7	Nucleus
BraC02g042590.1	2	29890158	29892097	Forward	315	1940	34538.5	8.9	-0.712	C1453H2388N446O497S15	Cytoplasm/Nucleus
BraC02g044260.1	2	30972169	30973538	Reverse	289	1370	31691.2	5.22	-0.558	C1354H2200N396O463S8	Cytoplasm/Nucleus
BraC02g045000.1	2	31430191	31430724	Forward	177	534	20687.2	8.05	-0.876	C882H1416N284O275S9	Nucleus
BraC02g047430.1	2	33042336	33044129	Forward	370	1794	42207.8	8.31	-0.536	C1845H2912N550O552S18	Nucleus
BraC02g047730.1	2	33247382	33247995	Reverse	191	614	22158.3	8.88	-0.622	C958H1551N289O291S12	Endoplasmic reticulum/Cytoplasm
BraC02g048410.1	2	33689925	33690539	Reverse	188	615	21954	9.47	-0.753	C947H1531N291O288S11	Endoplasmic reticulum
BraC03g000260.1	3	168134	173280	Reverse	448	5147	50001.1	6.51	-0.61	C2168H3439N651O679S16	Endoplasmic reticulum/Nucleus
BraC03g002970.1	3	1438992	1444153	Forward	454	5162	50604.8	6.6	-0.587	C2202H3480N654O684S17	Endoplasmic reticulum/Nucleus
BraC03g003610.1	3	1761560	1762042	Forward	160	483	19387.6	6.25	-1.203	C835H1290N260O258S9	Cytoplasm/Nucleus
BraC03g007230.1	3	3408549	3409130	Forward	193	582	22183.4	5.88	-0.978	C945H1489N287O318S7	Cytoplasm/Nucleus
BraC03g020800.2	3	10326887	10329171	Forward	373	2285	40269.5	5.09	-0.614	C1702H2751N507O592S15	Nucleus
BraC03g021920.1	3	10934442	10936316	Reverse	334	1875	37478.2	5.78	-0.977	C1594H2479N493O526S16	Nucleus
BraC03g022660.1	3	11315966	11318474	Reverse	306	2509	35003.7	5.83	-0.922	C1498H2375N453O495S11	Cytoplasm/Nucleus
BraC03g035840.1	3	17967071	17970601	Forward	331	3531	36830.4	8.99	-0.606	C1566H2555N487O509S15	Nucleus
BraC03g038580.1	3	19339801	19340693	Forward	148	893	16741.5	7.95	-1.261	C688H1157N225O248S6	Nucleus
BraC03g039400.1	3	19803543	19805021	Forward	326	1479	35641.7	7.66	-0.708	C1519H2434N458O503S15	Endoplasmic reticulum/Nucleus
BraC03g039750.1	3	19969490	19971674	Forward	355	2185	39362.8	9.24	-0.846	C1685H2681N519O544S14	Endoplasmic reticulum/Nucleus
BraC03g045220.1	3	23057320	23057871	Forward	183	552	21302.8	8.05	-0.888	C914H1453N291O283S8	Endoplasmic reticulum/Nucleus
BraC03g061850.1	3	33049600	33050061	Forward	153	462	17258.3	5.42	-0.658	C729H1193N215O252S8	Endoplasmic reticulum/Nucleus/Cytoplasm
BraC03g064330.1	3	34520536	34521285	Forward	231	750	26955.7	9.3	-0.779	C1172H1879N349O355S13	Endoplasmic reticulum/Nucleus
BraC04g004190.1	4	2607604	2608895	Forward	269	1292	29821.6	9.25	-0.86	C1269H2092N390O416S11	Endoplasmic reticulum/Nucleus
BraC04g004310.1	4	2687280	2688800	Forward	438	1521	48906.3	5.93	-0.431	C2154H3421N593O677S14	Nucleus
BraC04g005820.1	4	3836926	3841510	Forward	780	4585	85409.5	8.44	-0.296	C3709H6044N1084O1152S36	Nucleus
BraC04g017540.2	4	13402832	13405322	Reverse	473	2491	50942.7	9.02	-0.699	C2172H3502N652O726S18	Endoplasmic reticulum/Nucleus
BraC04g024930.1	4	18360014	18362125	Reverse	402	2112	43973.1	6.58	-0.659	C1886H3016N558O620S17	Nucleus
BraC04g027890.1	4	19997749	19999227	Reverse	404	1479	43218.1	9.39	-0.765	C1846H2942N586O587S15	Endoplasmic reticulum/Nucleus
BraC04g030930.1	4	21720379	21722727	Reverse	332	2349	37304.2	6.05	-0.939	C1589H2497N487O525S15	Nucleus
BraC04g031210.1	4	21857093	21859514	Reverse	626	2422	68690	5.48	-0.63	C2981H4751N843O970S24	Endoplasmic reticulum/Nucleus
BraC04g031300.1	4	21885893	21886822	Forward	276	930	31021.2	7.08	-0.769	C1333H2170N398O425S14	Endoplasmic reticulum/Nucleus
BraC05g002220.1	5	1481019	1483326	Reverse	354	2308	39596.5	5.97	-0.954	C1687H2651N519O561S13	Nucleus
BraC05g002400.1	5	1576905	1577937	Forward	281	1033	31565.9	9.06	-0.811	C1366H2218N412O423S12	Nucleus
BraC05g003230.1	5	2010942	2013061	Reverse	306	2120	34405.8	6.5	-0.948	C1468H2320N456O487S8	Nucleus
BraC05g009380.1	5	5269912	5271481	Forward	442	1570	46560.5	9.18	-0.777	C1977H3143N627O647S16	Endoplasmic reticulum/Nucleus
BraC05g022350.1	5	15119163	15120640	Forward	330	1478	36369.3	7.9	-0.858	C1542H2483N481O514S12	Nucleus
BraC05g034440.1	5	33787703	33789333	Reverse	355	1631	38173.6	9.45	-0.726	C1622H2605N497O535S17	Endoplasmic reticulum/Nucleus
BraC05g036280.1	5	34930588	34931224	Reverse	150	637	17018.8	5.98	-1.268	C700H1164N226O251S8	Nucleus
BraC05g041370.1	5	37864149	37866042	Reverse	331	1894	36851.4	8.66	-0.605	C1566H2562N488O511S14	Nucleus
BraC06g003710.1	6	2405439	2406808	Forward	367	1370	40278.9	9.26	-0.76	C1728H2774N518O566S13	Endoplasmic reticulum/Nucleus
BraC06g005390.3	6	3361985	3367469	Reverse	479	5485	53430.2	6.96	-0.561	C2312H3686N686O727S22	Nucleus
BraC06g009370.1	6	5314444	5315025	Forward	193	582	22456.8	6.44	-1.02	C952H1520N288O323S9	Nucleus
BraC06g014640.1	6	8188049	8190611	Reverse	462	2563	51056.7	5.59	-0.868	C2188H3492N646O729S17	Nucleus
BraC06g022310.1	6	14082270	14085447	Forward	377	3178	42771.1	7.73	-0.901	C1828H2937N555O588S21	Endoplasmic reticulum/Cytoplasm
BraC06g034860.1	6	33408804	33412420	Forward	367	3617	41951.5	7.3	-0.545	C1834H2880N548O548S18	Nucleus
BraC06g035550.1	6	33907360	33907917	Reverse	185	558	21337.2	9.11	-0.817	C912H1483N285O284S11	Endoplasmic reticulum/Nucleus
BraC06g036350.1	6	34356897	34357364	Forward	155	468	17278.2	5.65	-0.632	C724H1173N221O249S10	Endoplasmic reticulum
BraC06g036450.1	6	34483289	34483801	Forward	170	513	18615.6	5.34	-0.538	C780H1261N237O271S10	Endoplasmic reticulum/Nucleus
BraC06g038750.1	6	35951958	35953275	Forward	291	1318	31967.3	6.22	-0.712	C1347H2200N416O466S9	Nucleus
BraC06g041080.1	6	37356449	37358495	Reverse	314	2047	34376.2	8.37	-0.739	C1443H2358N444O498S15	Nucleus
BraC06g042940.1	6	38317302	38317820	Reverse	172	519	20129.3	5.59	-1.008	C865H1361N257O284S7	Nucleus
BraC06g046020.1	6	NP	NP	NP	170		19789	6.52	-0.918	C839H1353N259O279S8	Nucleus
BraC06g050540.1	6	42688845	42689963	Forward	266	1119	29795.5	5.62	-0.769	C1284H2058N380O412S12	Endoplasmic reticulum/Nucleus
BraC06g051300.1	6	43051339	43053013	Reverse	380	1675	42237.5	9.6	-0.752	C1826H2934N552O575S13	Endoplasmic reticulum/Nucleus
BraC06g051940.3	6	43359367	43361642	Forward	471	2276	52341.4	7.81	-0.693	C2249H3605N667O738S17	Nucleus
BraC07g002710.1	7	2236340	2237532	Forward	168	1193	18522.4	4.98	-0.658	C769H1246N234O275S11	Endoplasmic reticulum
BraC07g022530.1	7	18590602	18593832	Reverse	403	3231	44918.8	10.11	-0.676	C1955H3265N593O591S12	Chloroplast
BraC07g023180.1	7	18988995	18991143	Reverse	314	2149	35269.8	6.35	-0.96	C1500H2389N467O503S8	Nucleus
BraC07g025140.1	7	19916553	19916957	Reverse	134	405	15502.5	7.76	-0.933	C654H1087N205O214S8	Nucleus
BraC07g026920.1	7	20777587	20779808	Reverse	374	2222	42314.5	6.19	-0.56	C1836H2917N541O581S14	Nucleus
BraC07g027810.1	7	21349632	21350171	Reverse	179	540	19473.5	5.53	-0.61	C825H1320N252O280S7	Endoplasmic reticulum/Nucleus
BraC07g033710.1	7	24607409	24610050	Reverse	442	2642	49777.9	5.72	-0.484	C2150H3394N640O677S23	Nucleus
BraC07g038990.1	7	27301168	27302277	Forward	359	1110	36071	5.23	-0.196	C1556H2381N447O501S22	Cytoplasm/Nucleus
BraC07g041060.1	7	28289348	28290994	Forward	341	1647	39085.5	8.48	-0.451	C1709H2743N505O517S14	Nucleus
BraC08g007780.1	8	6211238	6213114	Forward	302	1877	33528.5	7.11	-0.746	C1435H2321N441O466S10	Nucleus
BraC08g016590.1	8	13514756	13515184	Reverse	142	429	16138.2	5.06	-0.654	C683H1120N198O230S11	Nucleus
BraC08g023460.1	8	17593732	17595658	Forward	444	1927	49366.7	6.24	-0.927	C2101H3352N634O704S19	Nucleus
BraC08g027780.1	8	19752918	19754510	Reverse	370	1593	41794.8	6.77	-0.628	C1801H2872N544O573S15	Nucleus
BraC08g034790.1	8	22849509	22851342	Reverse	320	1834	35360.2	5.35	-0.818	C1501H2379N447O506S18	Endoplasmic reticulum/Nucleus
BraC08g035030.1	8	22932787	22934882	Forward	381	2096	42569.3	5.91	-0.897	C1814H2898N544O606S17	Nucleus
BraC09g000960.1	9	685364	688253	Reverse	367	2890	39536.6	6.47	-0.948	C1693H2679N503O569S11	Nucleus
BraC09g001020.1	9	724254	725691	Reverse	295	1438	34475.6	8.67	-0.402	C1539H2404N426O443S16	Nucleus
BraC09g006060.1	9	3536335	3539053	Forward	221	2719	25781.1	9.15	-0.815	C1107H1772N356O335S11	Endoplasmic reticulum/Nucleus
BraC09g007910.1	9	4532414	4544202	Forward	385	1158	43966.9	8.59	-0.533	C1929H3059N569O577S16	Nucleus
BraC09g010420.1	9	6120469	6121267	Forward	184	799	21325.1	9.44	-0.927	C926H1491N283O284S6	Nucleus
BraC09g010600.1	9	6231756	6232262	Reverse	168	507	18496.5	5.11	-0.63	C768H1248N234O272S12	Endoplasmic reticulum/Nucleus
BraC09g023790.1	9	16907966	16908496	Forward	176	531	20611	7.04	-0.987	C881H1424N272O289S5	Cytoplasm/Nucleus
BraC09g038020.1	9	42797157	42799281	Reverse	382	2125	40578.2	5.63	-0.958	C1716H2694N520O597S13	Nucleus
BraC09g038170.1	9	42918827	42922126	Forward	593	3300	65104	6.31	-0.388	C2860H4570N794O891S24	Endoplasmic reticulum/Nucleus
BraC09g038420.1	9	43055485	43057352	Reverse	586	1868	64323	5.83	-0.409	C2820H4490N776O887S27	Endoplasmic reticulum/Nucleus
BraC09g053140.1	9	53611450	53613539	Reverse	384	2090	42148.7	5.96	-0.904	C1783H2874N556O598S15	Nucleus
BraC09g055600.1	9	55187865	55189098	Reverse	282	1234	31242.2	9.25	-0.84	C1331H2189N413O432S11	Endoplasmic reticulum/Nucleus
BraC09g055620.1	9	55194816	55196070	Reverse	289	1255	31894.9	9.09	-0.823	C1359H2233N421O442S11	Endoplasmic reticulum/Nucleus
BraC09g055640.1	9	55201638	55202899	Reverse	253	1262	28370.1	9.78	-0.93	C1212H1994N380O385S10	Endoplasmic reticulum/Nucleus
BraC09g056730.1	9	55820524	55822884	Reverse	328	2361	36520.9	6.11	-0.979	C1546H2451N485O527S8	Nucleus
BraC09g059910.1	9	57342603	57343028	Reverse	141	426	16184.3	6.38	-0.851	C678H1130N214O226S9	Nucleus
BraC09g063730.1	9	59437968	59439653	Forward	376	1686	41880.9	9.47	-0.789	C1802H2878N550O574S14	Nucleus
BraC09g068000.1	9	61405584	61406433	Forward	195	850	22658.7	5.42	-1.126	C955H1506N294O331S8	Nucleus
BraC09g070850.1	9	62813587	62819210	Forward	484	5624	53947.8	7.04	-0.503	C2336H3713N697O728S23	Nucleus
BraC09g071660.1	9	63190003	63192258	Reverse	324	2256	35841.7	5.63	-0.798	C1521H2410N454O513S18	Nucleus
BraC10g002520.1	10	1260292	1261328	Forward	297	1037	33775.6	6.64	-1.005	C1422H2302N438O481S17	Nucleus
BraC10g004690.1	10	2442313	2444451	Reverse	392	2139	43153.4	6.02	-0.923	C1833H2918N560O623S12	Nucleus
BraC10g006910.2	10	3894717	3897210	Forward	372	2494	40093.2	9.26	-0.6	C1715H2792N518O555S17	Endoplasmic reticulum/Nucleus
BraC10g025270.1	10	18680391	18680942	Reverse	183	552	21119.3	8.86	-1.027	C901H1436N280O298S5	Nucleus
BraC10g028400.1	10	20044457	20045431	Forward	164	975	18023.8	9.29	-1.211	C745H1256N248O267S2	Nucleus
BraC10g029390.1	10	20508583	20510223	Forward	364	1641	41817.3	6.61	-0.569	C1837H2882N530O557S16	Nucleus
BraC10g030960.1	10	21106456	21107143	Reverse	149	688	17425.1	9.05	-0.776	C761H1235N217O230S10	Nucleus
BraC10g031480.1	10	21336606	21339144	Reverse	327	2539	36377.1	8.92	-0.498	C1559H2544N474O498S15	Nucleus
BraC10g031570.1	10	21360429	21366156	Reverse	451	5728	50190.5	6.74	-0.557	C2185H3462N646O677S18	Endoplasmic reticulum/Nucleus
