# Supplementary material for: In-Depth Characterization of bZIP Genes in the Context of Endoplasmic Reticulum (ER) Stress in Brassica campestris ssp. chinensis
Source: Plants (Basel). 2024 Apr 22;13(8):1160. doi: 10.3390/plants13081160 (PMC11053814; doi:10.3390/plants13081160)
Supplement: Supplementary file 1 [file plants-13-01160-s001.zip › Supplementary file S3.xlsx]

## Sheet: GeneTPM
IDs	CK1	CK2	CK3	TM1	TM2	TM3	TT1	TT2	TT3
BraC01g001260	0.433316	0.89596	0.093516	11.8775	3.30205	7.36899	2.9755	10.76	17.198
BraC01g003670	3.68481	3.50362	5.67152	105.223	41.3009	46.1094	35.7682	31.2588	48.9266
BraC01g004180	6.11858	6.21289	14.3877	217.197	216.946	120.275	198.239	166.476	244.945
BraC01g038030	7.09141	10.4348	9.36521	55.1306	46.6977	40.5024	50.9207	38.293	64.9127
BraC01g039580	0.913455	1.82089	1.21131	1.87443	11.1542	16.0211	6.4229	4.97816	8.43391
BraC01g044020	1.79071	1.98846	2.64689	3.14042	3.58251	5.56928	3.13801	3.13178	3.29688
BraC01g044940	6.99688	8.99606	12.5422	19.3604	13.4346	16.2241	17.1535	19.5982	20.8936
BraC02g002200	7.21115	9.22964	4.44533	6.58426	13.0565	10.8092	7.01975	5.41248	8.32436
BraC02g003360	7.3043	7.50179	9.15443	2.58492	2.79943	4.25291	4.17973	5.62099	5.19043
BraC02g004000	10.0517	10.0891	31.0833	48.8727	78.8732	73.2857	21.2713	34.9888	24.2085
BraC02g006380	19.6805	24.0815	37.3411	0.402336	0.135963	0.588232	0.870406	0.676847	0.768528
BraC02g019500	0.185567	0	0	0	0	0	0	0	0
BraC02g023630	0.132107	0	0	0	0.096511	0.122765	0	0	0
BraC02g038580	1.58173	0.823263	0.083934	0.198056	0	0	0	0	0.036985
BraC02g041500	0	0.110295	0.117116	0.094983	0.480964	0	0	0	0
BraC02g042590	38.9462	58.0604	158.21	3.25677	1.3327	1.34139	17.2889	12.6029	16.6793
BraC02g044260	4.97025	4.13231	6.08861	24.5934	20.3291	28.7389	11.9961	15.8034	27.5376
BraC02g045000	0	0	0	0	0	0	0	0	0
BraC02g047430	1.08818	0.757546	2.26641	0.073501	0	0.28114	0	0.134974	0.848595
BraC02g047730	0	0	0	0	0	0	0	0	0.406191
BraC02g048410	0	0	0	0	0	0	0	0	0.096419
BraC03g000260	0	0	0	0	0	0	0	0	0
BraC03g002970	0.115147	0	0	0	0	0	0	0	0
BraC03g003610	0	0	0	0	0	0	0	0	0
BraC03g007230	1.61766	1.67143	5.16892	0	0	0	0.077462	0.106407	0
BraC03g020800	8.18465	9.44719	22.7521	16.6001	32.1944	15.0828	17.7065	37.9357	17.3016
BraC03g021920	0.590721	0.379676	0.694632	0.271937	0.130427	0	0	0.123242	0
BraC03g022660	0	0	0.281064	0	0	0	0	0	0
BraC03g035840	3.34337	4.00462	4.10461	4.19592	5.14957	5.19086	5.02418	2.63315	5.09984
BraC03g038580	7.45843	7.43848	17.2973	6.41483	40.6459	77.0383	11.0033	5.20554	8.19412
BraC03g039400	0.44831	0.266551	0.981367	1.26962	0.825798	1.93717	0.634775	0.20189	0.670288
BraC03g039750	1.74556	2.02875	1.94302	5.07227	1.11541	3.0391	1.74594	0.801034	2.08511
BraC03g045220	0	0	0	0	0	0	0	0	0
BraC03g061850	1.63153	1.21127	3.92024	26.2337	50.5077	34.7341	17.5309	21.6278	25.9096
BraC03g064330	0.254713	0.231998	0	1.53234	0.790612	1.59877	0.331148	2.475	4.01902
BraC04g004190	0	0	0	0	0	0	0	0	0
BraC04g004310	0	0.182388	0.091772	0	0.270276	0	0.063463	0	0.315885
BraC04g005820	1.13404	1.8305	0.3292	0.163302	0.230308	0.607402	0.054747	0.105462	0.201793
BraC04g017540	22.0222	26.9619	20.8519	28.8769	22.8504	39.9659	13.1556	9.71626	14.4695
BraC04g024930	10.3303	7.82137	10.4652	14.8335	21.7178	20.8093	26.2397	30.7953	30.1469
BraC04g027890	0.376075	0.490916	1.4386	2.74751	1.19428	1.46662	1.48869	1.58705	1.22165
BraC04g030930	0	0.013854	0.079937	0.054349	0	0	0	0	0
BraC04g031210	5.5233	7.09281	7.29963	15.7521	11.2838	11.8382	13.4044	10.539	13.6807
BraC04g031300	1.64315	2.27516	2.23427	3.92284	7.80168	2.57419	5.64434	5.23924	8.32836
BraC05g002220	1.70927	2.52403	7.59954	1.05047	1.32952	4.48156	1.46252	0.559251	0.937822
BraC05g002400	0	0	0	0	0	0	0	0	0
BraC05g003230	16.3371	18.8835	25.2435	1.03028	1.16274	1.8756	1.22107	1.8223	1.63757
BraC05g009380	0.55433	0.539633	0.739524	25.1893	28.8178	34.7529	3.70415	31.8112	4.85815
BraC05g022350	33.2877	42.2193	27.4389	62.7472	55.2425	66.8108	50.5241	54.6556	50.2584
BraC05g034440	14.4305	18.4587	11.7728	52.046	54.6942	38.7273	43.7586	41.5235	63.1269
BraC05g036280	8.19087	9.44265	11.2575	4.64504	17.9229	35.3123	9.69665	4.46308	10.129
BraC05g041370	2.47802	2.31084	3.43389	3.84189	5.72585	5.66671	4.89418	2.08875	6.31285
BraC06g003710	2.59478	3.11258	5.21227	18.9062	11.8386	11.4097	7.21523	7.42969	9.59135
BraC06g005390	0.36833	0.498701	0.286498	0.317189	0.587221	0.033806	0.127315	0	0.322587
BraC06g009370	0	0.228286	0	0.093603	0	0	0	0	0
BraC06g014640	4.25544	3.205	2.21083	18.7478	18.4848	17.1784	31.9132	13.887	43.4465
BraC06g022310	0	0	0	0	0	0	0	0	0
BraC06g034860	2.34412	4.1596	5.89395	2.80118	1.86496	2.95382	5.11071	6.37454	5.28327
BraC06g035550	0	0	0	0.465943	0.278368	0	0	0.110984	0.1039
BraC06g036350	0.580532	0.641213	0.592699	0.513502	0.399354	0.74521	0.176177	0.711748	0.600921
BraC06g036450	2.94188	5.69227	4.44229	3.22202	9.29886	5.76882	2.39555	3.62902	4.06415
BraC06g038750	2.28917	1.74249	1.15466	1.76202	2.71167	4.39528	2.63864	2.58413	3.97428
BraC06g041080	14.4146	24.0236	60.9924	4.0281	10.2964	7.38937	31.0457	4.90653	31.1717
BraC06g042940	0.385476	0.025756	0	0	0.055564	0	0.176057	0	0
BraC06g046020	0.199588	0.504558	1.12461	0	0.298953	0.210849	0	0.115488	0.185207
BraC06g050540	13.3255	17.6579	27.4904	73.6649	35.429	41.9537	47.587	44.0236	49.3792
BraC06g051300	0	0	0	0	0.107959	0	0	0.266242	0
BraC06g051940	11.2068	14.7238	29.9912	15.4848	9.24361	17.1468	13.2345	3.28522	18.1815
BraC07g002710	57.0078	58.5574	36.9703	13.8467	27.8776	17.9973	32.4655	18.5271	29.5978
BraC07g022530	45.1265	34.514	20.2318	1.28411	4.11549	8.63483	0.737906	0.883614	0.75764
BraC07g023180	2.60521	4.7114	10.0137	0.250975	0.150216	0.049104	0.046232	0	0.089081
BraC07g025140	4.94257	5.59644	7.75172	50.0189	103.845	78.4382	44.5643	56.4466	78.7061
BraC07g026920	5.3894	2.93527	3.22925	5.35257	10.9176	4.58157	8.36462	13.184	8.01308
BraC07g027810	4.23043	4.22696	4.74914	121.964	46.4082	73.6394	12.7791	32.4813	26.9715
BraC07g033710	0	0	0	0	0	0	0	0.139329	0
BraC07g038990	1.81168	1.14785	0.770538	1.12494	1.22887	0.450825	0.16772	0.018349	0.356959
BraC07g041060	5.08325	3.91382	2.68332	12.5725	36.7312	16.5642	14.2104	19.3021	13.8923
BraC08g007780	1.4858	1.46823	1.8878	3.63144	5.116	4.6317	2.41714	2.29326	2.71167
BraC08g016590	2.55364	3.71879	0.140867	2.84636	14.7141	10.0928	1.96854	2.54885	2.91799
BraC08g023460	2.55829	3.67926	2.78264	7.16963	7.04144	11.1929	3.976	3.87135	5.48553
BraC08g027780	1.44506	1.44922	0.222073	8.35384	15.9854	8.4639	14.0002	20.6403	15.2055
BraC08g034790	3.68289	6.35713	2.31026	2.95897	3.40238	7.11173	1.55364	2.14828	3.19549
BraC08g035030	1.05718	1.22137	0.984506	6.01131	8.65794	7.06574	2.49386	4.13262	4.35879
BraC09g000960	7.8471	10.6048	38.6044	16.1009	20.1687	24.7726	23.1764	16.0696	30.3535
BraC09g001020	1.38118	1.07785	2.43021	0.338338	0.213792	0.61957	0.638468	1.00635	1.06263
BraC09g006060	0	0	0	0	0	0	0	0.370396	0
BraC09g007910	1.7179	1.4394	2.93912	0.599447	0.71626	0.431116	0.823086	1.45466	1.82103
BraC09g010420	0	0	0	0	0	0	0	0	0
BraC09g010600	26.5626	28.5353	42.8635	142.956	248.982	156.822	186.686	313.468	172.857
BraC09g023790	0	0	0	0.079261	1.11002	0.196052	0	0.403141	0
BraC09g038020	13.2894	13.4154	10.0403	29.3044	24.9199	28.4345	23.1704	12.9312	27.1056
BraC09g038170	0	0.260744	3.31951	7.55842	4.19375	5.55936	0.365142	14.7215	0.316835
BraC09g038420	8.28986	8.98138	0.723781	3.0842	12.5555	17.0238	15.1555	4.60095	20.7122
BraC09g053140	14.1568	15.0158	26.5819	61.0305	30.1119	40.4511	49.8729	63.8921	57.0317
BraC09g055600	4.57466	5.20624	9.05958	9.59904	11.9007	8.95674	8.82107	3.50967	6.9129
BraC09g055620	0.096525	0.052147	0.610588	0.289981	0.669008	0.447802	0.503853	0.419835	0.564457
BraC09g055640	3.67873	4.69407	11.249	12.3954	10.8312	10.7793	9.90863	5.16282	8.97129
BraC09g056730	18.2562	24.14	26.3409	0.579765	0.356194	1.53339	0.038967	0.378642	0.695906
BraC09g059910	15.5489	15.23	24.7488	121.805	116.148	120.616	147.374	113.35	189.737
BraC09g063730	0	0	0	0	0	0	0	0	0
BraC09g068000	0.153213	0.077201	0	0	0.385528	0.143349	0.070798	0	0.067751
BraC09g070850	0	0	0.041534	0	0	0	0	0	0
BraC09g071660	5.85991	7.19853	23.6955	4.32327	5.44076	8.33357	2.48671	2.0658	3.86816
BraC10g002520	6.03975	5.03737	9.93815	25.1997	18.4978	15.8517	27.7325	23.6646	30.4054
BraC10g004690	4.2783	4.73207	3.69562	11.7542	12.3965	14.9176	12.6495	14.4253	13.1143
BraC10g006910	6.94913	8.05462	6.79573	164.244	34.4601	52.566	70.3395	64.0194	89.2807
BraC10g025270	0	0	0.383175	0	0	0	0	0	0
BraC10g028400	17.2108	16.4695	24.391	92.5311	144.482	182.994	56.0505	97.0466	61.2273
BraC10g029390	1.95254	2.2645	3.06649	0.119136	1.01982	0.974634	0.173509	0.082559	0.198967
BraC10g030960	0	0	0	0	0	0	0	0	0
BraC10g031480	2.68837	4.37164	8.20633	4.53657	6.84848	7.1369	4.09731	2.53268	5.25722
BraC10g031570	0	0	0	0	0	0	0	0	0

## Sheet: Avg. for Heatmap
IDs	CK	TM	TT
BraC01g001260	0.474264	7.51619	10.3111
BraC01g003670	4.28665	64.2111	38.6512
BraC01g004180	8.90639	184.806	203.22
BraC01g038030	8.96379	47.4436	51.3755
BraC01g039580	1.31522	9.68322	6.61166
BraC01g044020	2.14202	4.0974	3.18889
BraC01g044940	9.51171	16.3397	19.2151
BraC02g002200	6.96204	10.15	6.91886
BraC02g003360	7.98684	3.21242	4.99705
BraC02g004000	17.0747	67.0105	26.8229
BraC02g006380	27.0344	0.37551	0.771927
BraC02g019500	0.0618557	0	0
BraC02g023630	0.0440357	0.073092	0
BraC02g038580	0.829644	0.0660187	0.0123283
BraC02g041500	0.0758037	0.191982	0
BraC02g042590	85.0721	1.97695	15.5237
BraC02g044260	5.06373	24.5538	18.4457
BraC02g045000	0	0	0
BraC02g047430	1.37071	0.118214	0.327856
BraC02g047730	0	0	0.135397
BraC02g048410	0	0	0.0321397
BraC03g000260	0	0	0
BraC03g002970	0.0383823	0	0
BraC03g003610	0	0	0
BraC03g007230	2.81934	0	0.0612897
BraC03g020800	13.4613	21.2925	24.3146
BraC03g021920	0.55501	0.134121	0.0410807
BraC03g022660	0.093688	0	0
BraC03g035840	3.81753	4.84545	4.25239
BraC03g038580	10.7314	41.3663	8.13432
BraC03g039400	0.565409	1.3442	0.502318
BraC03g039750	1.90578	3.07559	1.54403
BraC03g045220	0	0	0
BraC03g061850	2.25435	37.1585	21.6894
BraC03g064330	0.162237	1.30724	2.27506
BraC04g004190	0	0	0
BraC04g004310	0.0913867	0.090092	0.126449
BraC04g005820	1.09791	0.333671	0.120667
BraC04g017540	23.2787	30.5644	12.4471
BraC04g024930	9.53896	19.1202	29.0606
BraC04g027890	0.76853	1.80281	1.43246
BraC04g030930	0.0312637	0.0181163	0
BraC04g031210	6.63858	12.9581	12.5414
BraC04g031300	2.05086	4.76624	6.40398
BraC05g002220	3.94428	2.28718	0.98653
BraC05g002400	0	0	0
BraC05g003230	20.1547	1.35621	1.56031
BraC05g009380	0.611162	29.5867	13.4578
BraC05g022350	34.3153	61.6002	51.8127
BraC05g034440	14.8873	48.4892	49.4697
BraC05g036280	9.63035	19.2934	8.09625
BraC05g041370	2.74091	5.07815	4.43193
BraC06g003710	3.63988	14.0515	8.07876
BraC06g005390	0.38451	0.312739	0.149967
BraC06g009370	0.0760953	0.031201	0
BraC06g014640	3.22376	18.137	29.7489
BraC06g022310	0	0	0
BraC06g034860	4.13256	2.53999	5.58951
BraC06g035550	0	0.248104	0.071628
BraC06g036350	0.604815	0.552689	0.496282
BraC06g036450	4.35881	6.09657	3.36291
BraC06g038750	1.72877	2.95632	3.06568
BraC06g041080	33.1435	7.23795	22.3746
BraC06g042940	0.137077	0.0185213	0.0586857
BraC06g046020	0.609585	0.169934	0.100232
BraC06g050540	19.4913	50.3492	46.9966
BraC06g051300	0	0.0359863	0.0887473
BraC06g051940	18.6406	13.9584	11.5671
BraC07g002710	50.8452	19.9072	26.8635
BraC07g022530	33.2908	4.67814	0.793053
BraC07g023180	5.77677	0.150098	0.0451043
BraC07g025140	6.09691	77.4339	59.9057
BraC07g026920	3.8513	6.95058	9.85388
BraC07g027810	4.40218	80.6704	24.0773
BraC07g033710	0	0	0.046443
BraC07g038990	1.24335	0.934878	0.181009
BraC07g041060	3.89346	21.956	15.8016
BraC08g007780	1.61394	4.45971	2.47403
BraC08g016590	2.13777	9.21776	2.47846
BraC08g023460	3.00673	8.46799	4.44429
BraC08g027780	1.03878	10.9344	16.6153
BraC08g034790	4.11676	4.49103	2.29913
BraC08g035030	1.08769	7.245	3.66176
BraC09g000960	19.0188	20.3474	23.1998
BraC09g001020	1.62975	0.390567	0.902482
BraC09g006060	0	0	0.123465
BraC09g007910	2.03214	0.582274	1.36626
BraC09g010420	0	0	0
BraC09g010600	32.6538	182.92	224.337
BraC09g023790	0	0.461778	0.13438
BraC09g038020	12.2484	27.5529	21.0691
BraC09g038170	1.19342	5.77051	5.1345
BraC09g038420	5.99834	10.8878	13.4895
BraC09g053140	18.5848	43.8645	56.9322
BraC09g055600	6.28016	10.1522	6.41455
BraC09g055620	0.253087	0.46893	0.496048
BraC09g055640	6.54059	11.3353	8.01425
BraC09g056730	22.9124	0.823116	0.371172
BraC09g059910	18.5092	119.523	150.154
BraC09g063730	0	0	0
BraC09g068000	0.0768047	0.176292	0.046183
BraC09g070850	0.0138447	0	0
BraC09g071660	12.2513	6.03254	2.80689
BraC10g002520	7.00509	19.8497	27.2675
BraC10g004690	4.23533	13.0227	13.3964
BraC10g006910	7.26649	83.7567	74.5465
BraC10g025270	0.127725	0	0
BraC10g028400	19.3571	140.002	71.4415
BraC10g029390	2.42784	0.704529	0.151678
BraC10g030960	0	0	0
BraC10g031480	5.08878	6.17398	3.9624
BraC10g031570	0	0	0

## Sheet: Clusters
Gene IDs	clusters
BraC01g001260	2
BraC01g003670	4
BraC01g004180	2
BraC01g038030	2
BraC01g039580	4
BraC01g044020	4
BraC01g044940	2
BraC02g002200	1
BraC02g003360	3
BraC02g004000	1
BraC02g006380	3
BraC02g019500	3
BraC02g023630	1
BraC02g038580	3
BraC02g041500	1
BraC02g042590	3
BraC02g044260	4
BraC02g047430	3
BraC02g047730	2
BraC02g048410	2
BraC03g002970	3
BraC03g007230	3
BraC03g020800	2
BraC03g021920	3
BraC03g022660	3
BraC03g035840	4
BraC03g038580	1
BraC03g039400	1
BraC03g039750	1
BraC03g061850	4
BraC03g064330	2
BraC04g004310	2
BraC04g005820	3
BraC04g017540	1
BraC04g024930	2
BraC04g027890	4
BraC04g030930	3
BraC04g031210	4
BraC04g031300	2
BraC05g002220	3
BraC05g003230	3
BraC05g009380	4
BraC05g022350	4
BraC05g034440	2
BraC05g036280	1
BraC05g041370	4
BraC06g003710	4
BraC06g005390	3
BraC06g009370	3
BraC06g014640	2
BraC06g034860	2
BraC06g035550	4
BraC06g036350	3
BraC06g036450	1
BraC06g038750	2
BraC06g041080	3
BraC06g042940	3
BraC06g046020	3
BraC06g050540	4
BraC06g051300	2
BraC06g051940	3
BraC07g002710	3
BraC07g022530	3
BraC07g023180	3
BraC07g025140	4
BraC07g026920	2
BraC07g027810	1
BraC07g033710	2
BraC07g038990	3
BraC07g041060	4
BraC08g007780	4
BraC08g016590	1
BraC08g023460	1
BraC08g027780	2
BraC08g034790	1
BraC08g035030	4
BraC09g000960	2
BraC09g001020	3
BraC09g006060	2
BraC09g007910	3
BraC09g010600	2
BraC09g023790	4
BraC09g038020	4
BraC09g038170	4
BraC09g038420	2
BraC09g053140	2
BraC09g055600	1
BraC09g055620	2
BraC09g055640	4
BraC09g056730	3
BraC09g059910	2
BraC09g068000	1
BraC09g070850	3
BraC09g071660	3
BraC10g002520	2
BraC10g004690	2
BraC10g006910	4
BraC10g025270	3
BraC10g028400	4
BraC10g029390	3
BraC10g031480	1
