# Supplementary material for: In-Depth Characterization of bZIP Genes in the Context of Endoplasmic Reticulum (ER) Stress in Brassica campestris ssp. chinensis
Source: Plants (Basel). 2024 Apr 22;13(8):1160. doi: 10.3390/plants13081160 (PMC11053814; doi:10.3390/plants13081160)
Supplement: Supplementary file 1 [file plants-13-01160-s001.zip › Supplementary file S4.xlsx]

## Sheet: BioinfoPaper
Supplementary file S4
Primers used for gene cloning during study
Gene ID	Gene Name	F Primer	R Primer
BraC02g042590.1	BcbZIP60a	TGGAAAAGACTCTCTCTGTCGAAG	CTACTGATCCCCAACACTGCG
BraC06g041080.1	BcbZIP60b	TGGAAAAAGTTTTCTCTGTCGAAG	CTACTTATCCCCAACGCTGCG
BraC09g070470.1	BcBiP3	ATGGAAAAGACTCTCTCTGTCGAAG	CTACTGATCCCCAACACTGCG
Primers used for Y2H during study
Gene ID	Gene Name+ Vector	F Primer	R Primer
BraC02g042590.1	BcbZIP60a+BD	atggccatggaggccgaattcATGGAAAAGACTCTCTCTGTCGAAG	ccgctgcaggtcgacggatccCTACTGATCCCCAACACTGCG
BraC06g041080.1	BcbZIP60b+BD	atggccatggaggccgaattcATGGAAAAAGTTTTCTCTGTCGAAG	ccgctgcaggtcgacggatccCTACTTATCCCCAACGCTGCG
BraC09g070470.1	BcBiP3+ AD	gccatggaggccagtgaattcATGACGAATAAAGCTCTTGCATACTT	cagctcgagctcgatggatccCTATAACTCATCATCACCAACTTCTTCA
Primers used for BiFC during study
Gene ID	Gene Name+ Vector	F Primer	R Primer
BraC02g042590.1	BcbZIP60a+pSPYCE-C	tggcgcgccactagtggatccATGGAAAAGACTCTCTCTGTCGAAG	gtacatcccgggagcggtaccCTGATCCCCAACACTGCGAA
BraC06g041080.1	BcbZIP60b+pSPYCE-C	tggcgcgccactagtggatccATGGAAAAAGTTTTCTCTGTCGAAG	gtacatcccgggagcggtaccCTTATCCCCAACGCTGCGA
BraC02g042590.1	BcbZIP60a+pSPYNE-N	tggcgcgccactagtggatccATGGAAAAGACTCTCTCTGTCGAAG	ctccatcccgggagcggtaccCTGATCCCCAACACTGCGAA
BraC06g041080.1	BcbZIP60b+pSPYNE-N	tggcgcgccactagtggatccATGGAAAAAGTTTTCTCTGTCGAAG	ctccatcccgggagcggtaccCTTATCCCCAACGCTGCGA
BraC09g070470.1	BcBiP+ pSPYCE-C	tggcgcgccactagtggatccATGACGAATAAAGCTCTTGCATACTT	gtacatcccgggagcggtaccTAACTCATCATCACCAACTTCTTCATC
BraC09g070470.1	BcBiP+pSPYNE-N	tggcgcgccactagtggatccATGACGAATAAAGCTCTTGCATACTT	ctccatcccgggagcggtaccTAACTCATCATCACCAACTTCTTCATC
Primers used for subcellular localisation during study
Gene ID	Gene Name+ Vector	F Primer	R Primer
BraC02g042590.1	BcbZIP60a+pCambia1300	atacaccaaatcgactctagaATGGAAAAGACTCTCTCTGTCGAAG	gcccttgctcaccatggtaccCTGATCCCCAACACTGCGAA
BraC06g041080.1	BcbZIP60b+pCambia1300	atacaccaaatcgactctagaATGGAAAAAGTTTTCTCTGTCGAAG	gcccttgctcaccatggtaccCTTATCCCCAACGCTGCGA
